# Supplementary material
Source: Springer Nature journal article supplement (https://www.springermedizin.de/resource/supplementary/12936_2008_670_MOESM9_ESM.pdf/9547964)

**a**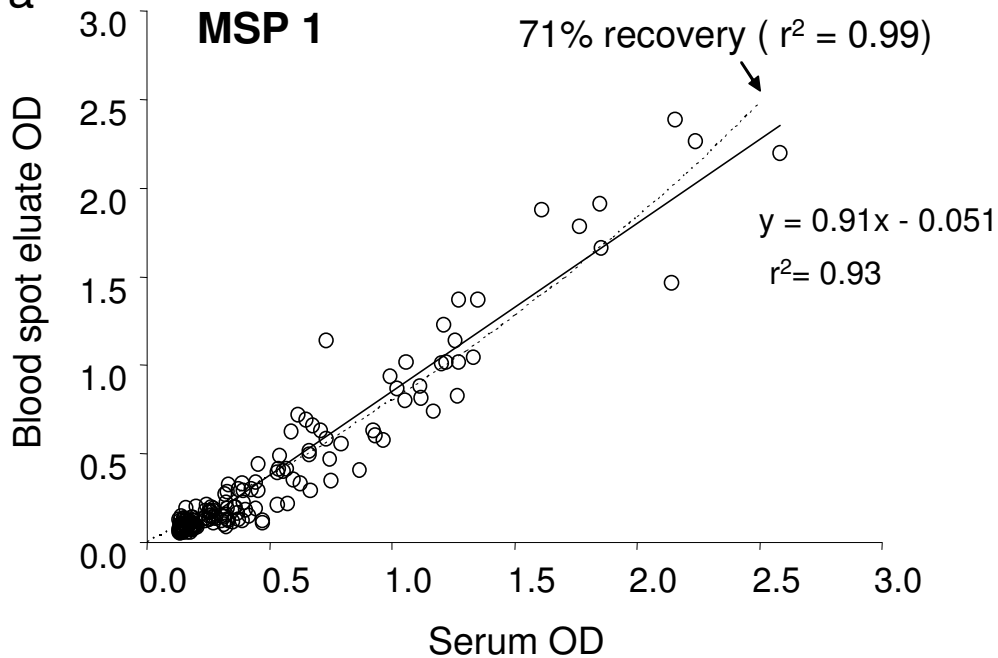**b**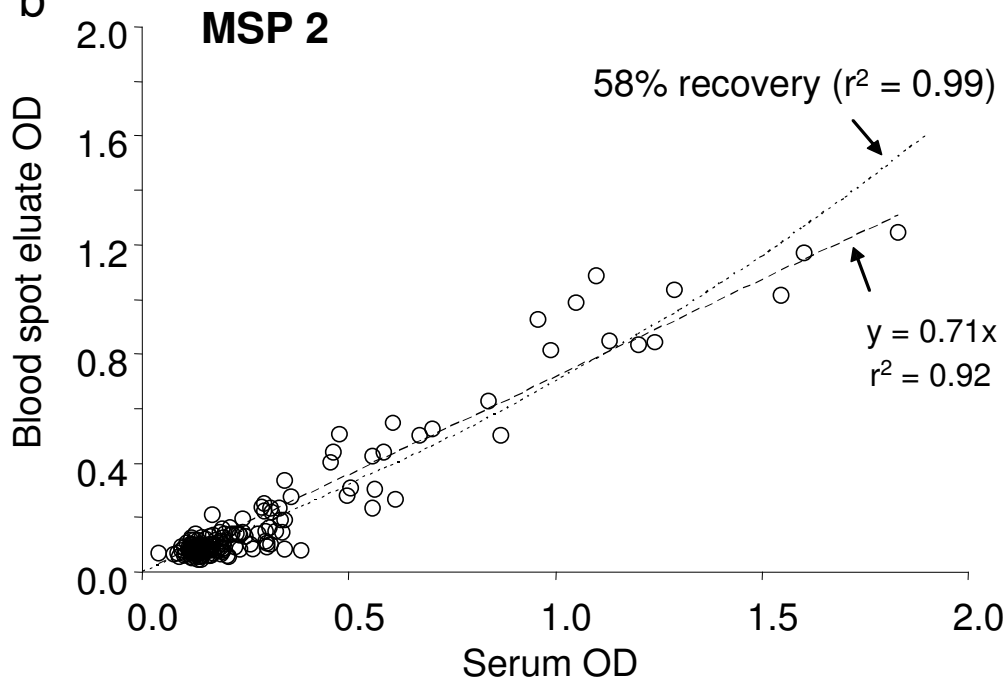

Supplement: MOESM9 [file 9547964]
